# Supplementary material for: Improving both activity and stability for direct conversion of cellulose to ethanol by decorating Pt/WOx with mononuclear NbOx
Source: Royal Society of Chemistry journal article supplement (doi:10.1039/d4gc03390f), 2024-01-01
Supplement: d4gc03390f1.pdf [file d4gc03390f1.pdf]

# **Improving both activity and stability for direct conversion of cellulose to ethanol by decorating Pt/WO<sub>x</sub> with mononuclear NbO<sub>x</sub>**

Weixiang Guan,<sup>a</sup> Chen Cao<sup>a,b</sup>, Fei Liu,<sup>a</sup> Aiqin Wang\*<sup>a</sup> and Tao Zhang<sup>a</sup>

<sup>a</sup> CAS Key Laboratory of Science and Technology on Applied Catalysis, Dalian Institute of Chemical Physics, Chinese Academy of Sciences, Dalian 116023, China.

\*Corresponding author: [aqwang@dicp.ac.cn](mailto:aqwang@dicp.ac.cn)

<sup>b</sup> University of Chinese Academy of Sciences, Beijing 100049, China.

**Keywords:** Cellulose, Ethanol, Metal-support interaction, WO<sub>x</sub>, Multifunctional catalysts

**Table S1** Physicochemical properties of WO<sub>x</sub> supported catalysts.

| Sample                      | S <sub>BET</sub><br>m <sup>2</sup> /g | Average pore<br>diameter<br>nm | Total pore<br>volume<br>(cm <sup>3</sup> /g) | E <sub>g</sub> <sup>a</sup><br>(eV) |
|-----------------------------|---------------------------------------|--------------------------------|----------------------------------------------|-------------------------------------|
| 0.5Pt/WO <sub>x</sub>       | 65.3                                  | 7.6                            | 0.12                                         | 2.73                                |
| 0.1Nb/0.5Pt/WO <sub>x</sub> | 66.8                                  | 9.8                            | 0.16                                         | 2.52                                |
| 0.1Ta/0.5Pt/WO <sub>x</sub> | 59.6                                  | 10.3                           | 0.15                                         | 2.68                                |
| 0.1Mo/0.5Pt/WO <sub>x</sub> | 62.2                                  | 10.5                           | 0.16                                         | 2.61                                |

<sup>a</sup> The electronic edge values of various WO<sub>x</sub> based samples were determined by UV-vis DRS spectra.

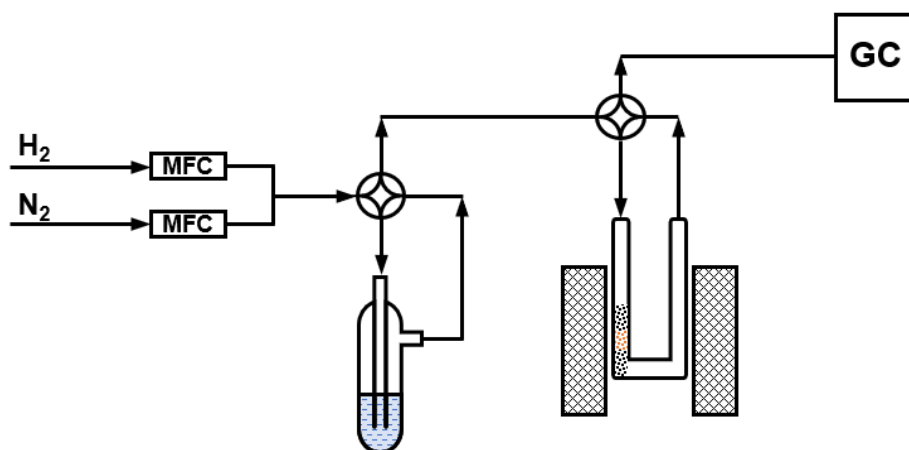

**Figure S1** Schematic diagram of 2-butanol dehydration/dehydrogenation experiments

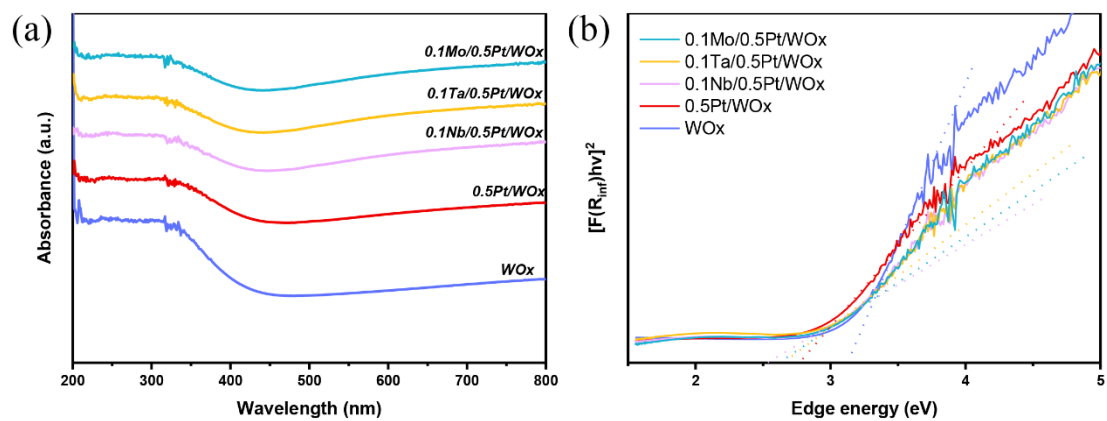

**Figure S2** UV-vis DRS spectra (a) and edge energy (b) of the various  $WO_x$  based catalysts.

**Table S2** The hydrogenolysis of EG over various catalysts

| Catalyst                    | Conversion (%) | Ethanol selectivity (%) |
|-----------------------------|----------------|-------------------------|
| 0.5Pt/WO <sub>x</sub>       | 6.7            | 40.6                    |
| 0.1Mo/0.5Pt/WO <sub>x</sub> | 10.2           | 66.9                    |
| 0.1Nb/0.5Pt/WO <sub>x</sub> | 16.4           | 80.4                    |
| 0.1Ta/0.5Pt/WO <sub>x</sub> | 11.5           | 70.2                    |

Reaction conditions: 0.1 g catalyst, 0.1 g ethylene glycol, 9.9 g H<sub>2</sub>O, 180 °C, 4.0 MPa H<sub>2</sub>, 2 h, 700 rpm.

**Table S3** The effect of Ta and Fe loadings on the catalytic performance for the one pot conversion of cellulose.

| Entry | Catalyst                     | Carbon yield (%) |         |        |          |         |      |
|-------|------------------------------|------------------|---------|--------|----------|---------|------|
|       |                              | EG               | Ethanol | 1,2-PG | Propanol | Butanol | TOC  |
| 1     | 0.5Pt/WO <sub>x</sub>        | 15.2             | 17.7    | 1.6    | 5.7      | 3.3     | 67.0 |
| 2     | 0.05Ta/0.5Pt/WO <sub>x</sub> | 20.2             | 18.3    | 1.9    | 1.1      | 5.8     | 74.5 |
| 3     | 0.1Ta/0.5Pt/WO <sub>x</sub>  | 24.8             | 22.0    | 4.3    | 3.2      | 3.4     | 79.1 |
| 4     | 0.2Ta/0.5Pt/WO <sub>x</sub>  | 18.5             | 18.2    | 1.3    | 1.6      | 5.5     | 73.6 |
| 5     | 0.05Fe/0.5Pt/WO <sub>x</sub> | 21.9             | 20.0    | 2.5    | 1.6      | 6.1     | 77.4 |
| 6     | 0.1Fe/0.5Pt/WO <sub>x</sub>  | 12.4             | 22.4    | 1.5    | 7.0      | 3.6     | 78.1 |
| 7     | 0.2Fe/0.5Pt/WO <sub>x</sub>  | 29.1             | 14.9    | 2.0    | 1.3      | 7.7     | 75.4 |

Reaction conditions: 0.1 g catalyst, 0.1 g cellulose, 9.9 g H<sub>2</sub>O, 245 °C, 6.0 MPa H<sub>2</sub>, 2 h, 700 rpm. Under the reaction conditions, the cellulose was completely converted with all of the investigated catalysts. 1,2-PG stands for 1,2-propanediol.

**Table S4** The comparison of ethanol formation rate over various catalysts.

| No | Catalyst                                             | Formation rate<br>$\text{g}_{\text{ethanol}} \cdot \text{g}_{\text{metal}}^{-1} \cdot \text{h}^{-1}$ | Ref              |
|----|------------------------------------------------------|------------------------------------------------------------------------------------------------------|------------------|
| 1  | 5Ru-25WO <sub>x</sub> /HZSM-5+ 5Ru/WO <sub>x</sub>   | 0.34                                                                                                 | 1                |
| 2  | 2Ir-20WO <sub>x</sub> /SiO <sub>2</sub>              | 1.56                                                                                                 | 2                |
| 2  | 5Pt/WO <sub>x</sub> +5Pt@HZSM-5                      | 2.09                                                                                                 | 3                |
| 3  | 2Pt/ZrO <sub>2</sub> +H <sub>2</sub> WO <sub>4</sub> | 4.91                                                                                                 | 4                |
| 4  | 2Pd-20Cu-30WO <sub>x</sub> /SiO <sub>2</sub>         | 8.16                                                                                                 | 5                |
| 5  | 0.1Mo/2Pt/WO <sub>x</sub>                            | 12.44                                                                                                | 6                |
| 6  | <b>0.1Nb/0.5Pt/WO<sub>x</sub></b>                    | <b>25.90</b>                                                                                         | <b>This work</b> |

Ethanol formation rate: (Ethanol content (mol)×yield×46.07)/(reaction time× amounts of catalyst ×precious metal loading).

### Notes and references

1. C. Li, G. Xu, C. Wang, L. Ma, Y. Qiao, Y. Zhang and Y. Fu, *Green Chem.*, 2019, **21**, 2234-2239.
2. Y. Weng, Y. Wang, M. Zhang, X. Wang, Q. Sun, S. Mu, H. Wang, M. Fan and Y. Zhang, *Catal. Today*, 2023, **407**, 89-95.
3. Y. Wu, C. Dong, H. Wang, J. Peng, Y. Li, C. Samart and M. Ding, *ACS Sustainable Chem. Eng.*, 2022, **10**, 2802-2810.
4. H. Song, P. Wang, S. Li, W. Deng, Y. Li, Q. Zhang and Y. Wang, *Chem Commun (Camb)*, 2019, **55**, 4303-4306.
5. D. Chu, Z. Luo, Y. Xin, C. Jiang, S. Gao, Z. Wang and C. Zhao, *Fuel*, 2021, **292**, 120311-120318.
6. M. Yang, H. Qi, F. Liu, Y. Ren, X. Pan, L. Zhang, X. Liu, H. Wang, J. Pang, M. Zheng, A. Wang and T. Zhang, *Joule*, 2019, **3**, 1937-1948.

**Table S5** The catalytic performance of Pt/WO<sub>x</sub> for the one-pot conversion of cellulose

| Entry | Catalyst               | Carbon yield (%) |         |        |          |         |      |
|-------|------------------------|------------------|---------|--------|----------|---------|------|
|       |                        | EG               | Ethanol | 1,2-PG | Propanol | Butanol | TOC  |
| 1     | WO <sub>x</sub>        | 1.4              | 0       | 1.0    | 1.6      | 1.5     | 63.2 |
| 2     | 0.05Pt/WO <sub>x</sub> | 10.0             | 10.3    | 1.2    | 9.0      | 2.7     | 81.1 |
| 3     | 0.1Pt/WO <sub>x</sub>  | 9.8              | 13.3    | 1.2    | 5.7      | 3.2     | 70.3 |
| 4     | 0.25Pt/WO <sub>x</sub> | 9.8              | 15.3    | 0.9    | 8.3      | 2.7     | 64.8 |
| 5     | 0.5Pt/WO <sub>x</sub>  | 15.2             | 17.7    | 1.6    | 5.7      | 3.3     | 67.0 |
| 6     | 1.0Pt/WO <sub>x</sub>  | 10.9             | 18.4    | 1.0    | 6.5      | 3.5     | 51.4 |
| 7     | 2.0Pt/WO <sub>x</sub>  | 4.9              | 20.3    | 1.9    | 5.7      | 2.4     | 55.5 |
| 8     | 4.0Pt/WO <sub>x</sub>  | 0.5              | 20.8    | 0      | 4.6      | 0       | 41.4 |

Reaction conditions: 0.1 g catalyst, 0.1 g cellulose, 9.9 g H<sub>2</sub>O, 245 °C, 6.0 MPa H<sub>2</sub>, 2 h, 700 rpm. Under the reaction conditions, the cellulose was completely converted with all of the investigated catalysts. 1,2-PG stands for 1,2-propanediol.



**Table S6** The one-pot conversion of cellulose over various supported Pt catalysts

| Entry | Catalyst                             | Carbon yield (%) |         |        |          |         |      |
|-------|--------------------------------------|------------------|---------|--------|----------|---------|------|
|       |                                      | EG               | Ethanol | 1,2-PG | Propanol | Butanol | TOC  |
| 1     | 0.5Pt/WO <sub>x</sub>                | 15.2             | 17.7    | 1.6    | 5.7      | 3.3     | 67.0 |
| 2     | 0.5Pt/Nb <sub>2</sub> O <sub>5</sub> | 3.7              | 8.2     | 3.1    | 4.9      | 4.0     | 53.8 |
| 3     | 0.5Pt/Ta <sub>2</sub> O <sub>5</sub> | 4.4              | 2.4     | 0.8    | 7.0      | 4.6     | 52.9 |
| 4     | 0.5Pt/MoO <sub>3</sub>               | 3.3              | 5.3     | 6.0    | 7.4      | 4.8     | 60.8 |

Reaction conditions: 0.1 g catalyst, 0.1 g cellulose, 9.9 g H<sub>2</sub>O, 245 °C, 6.0 MPa H<sub>2</sub>, 2 h. Under the reaction conditions, the cellulose was completely converted with all of the investigated catalysts. 1,2-PG stands for 1,2-propanediol.

**Table S7** The effect of cellulose concentration over 0.1Nb/0.5Pt/WO<sub>x</sub> catalyst

| Cellulose<br>Concentration<br>(wt.%) | Carbon yield (%) |         |        |          |         |      |
|--------------------------------------|------------------|---------|--------|----------|---------|------|
|                                      | EG               | Ethanol | 1,2-PG | Propanol | Butanol | TOC  |
| 1                                    | 21.8             | 33.7    | 3.2    | 5.5      | 4.9     | 73.1 |
| 2                                    | 11.0             | 28.3    | 2.4    | 7.2      | 5.2     | 71.1 |
| 5                                    | 7.8              | 21.3    | 2.7    | 10.1     | 5.8     | 56.6 |
| 10 <sup>a</sup>                      | 5.7              | 17.1    | 0.6    | 5.5      | 3.2     | 47.2 |

Reaction conditions: 0.1 g catalyst (<sup>a</sup>: 0.5 g catalyst), cellulose + H<sub>2</sub>O = 10.0 g, 245 °C, 6.0 MPa H<sub>2</sub>, 2 h, 700 rpm. TOC means total organic carbon in the liquid product. Under the reaction conditions, the cellulose was completely converted with all of the investigated catalysts. 1,2-PG stands for 1,2-propanediol.

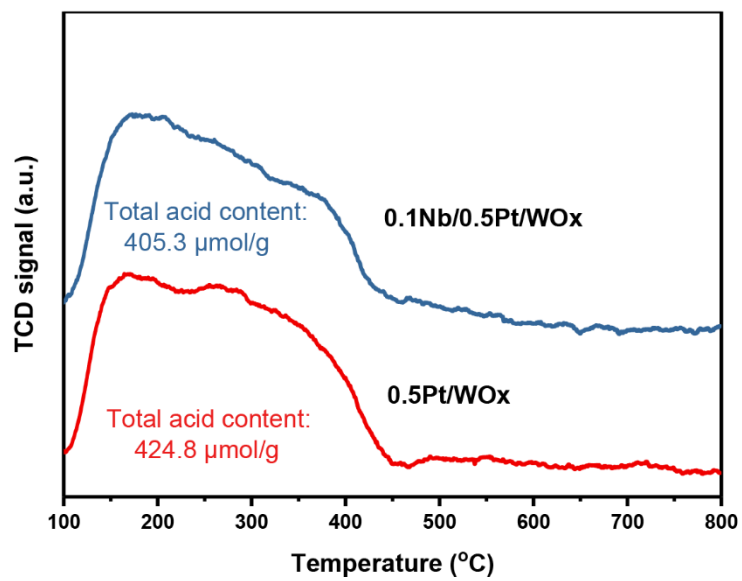

**Figure S3** The NH<sub>3</sub>-TPD profiles of 0.5Pt/WO<sub>x</sub> and 0.1Nb/0.5Pt/WO<sub>x</sub> samples.

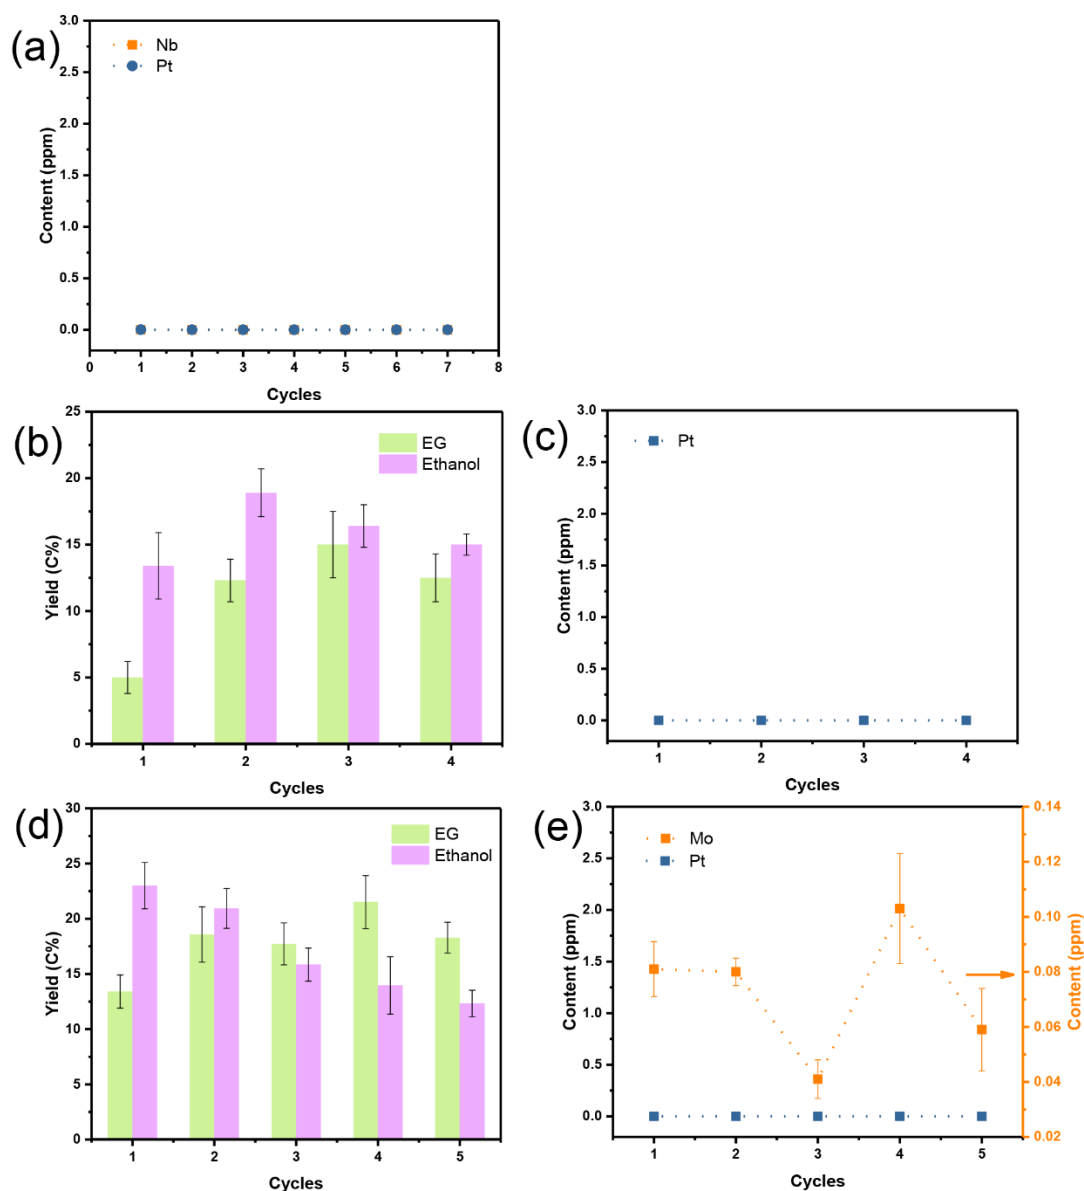

**Figure S4** The corresponding metal concentrations in liquid after each cycle determined by ICP-OES for 0.1Nb0.5Pt/WO<sub>x</sub> (a). The stability tests for the catalytic conversion of cellulose over 0.5Pt/WO<sub>x</sub>(b), 0.1Mo/0.5Pt/WO<sub>x</sub> (d) and corresponding metal concentrations in liquid after each cycle determined by ICP-OES (c, e). Reaction conditions: 0.1 g cellulose, 0.1 g catalyst, 9.9 g H<sub>2</sub>O, 245 °C, 6.0 MPa, 2 h, 700 rpm. Under the reaction conditions, the cellulose was completely converted with all of the investigated catalysts.

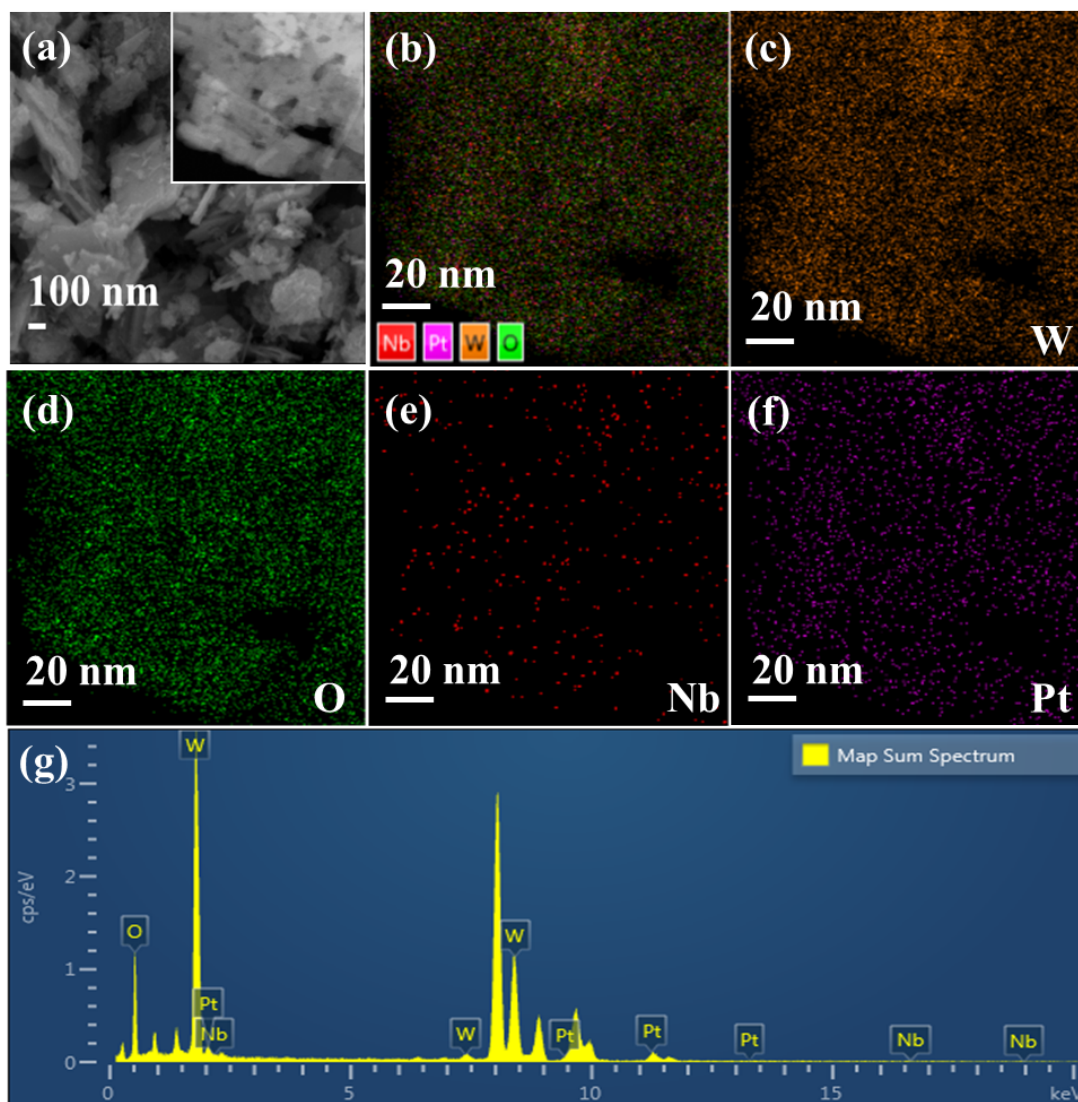

**Figure S5** The SEM image (a), HAADF-STEM images of spent 0.1Nb/0.5Pt/WO<sub>x</sub> (inset image of (a)) and corresponding elemental maps (b-f), and the EDX spectrum (g).
